# Supplementary material for: ACE Inhibitory Peptides Derived from Muscovy Duck (Cairina moschata) Plasma
Source: MDPI journal article supplement (doi:10.3390/foods12010050), 2022-12-22
Supplement: s1 [file s1]

**Table S1** Peptides identified by LC-MS/MS in the fraction B6 from RP-HPLC

| No. | Sequence                | Length | Mass/Da  | Proteins   | Charges | Score  | Intensity              |
|-----|-------------------------|--------|----------|------------|---------|--------|------------------------|
| 1   | AAGIGDLGTGTGPDPAQWL     | 20     | 1866.911 | R0KEB6     | 2       | 41.052 | 0                      |
| 2   | AEDNADTLALVFEAPNQEK     | 19     | 2073.986 | R0K8I7     | 2       | 56.648 | 0                      |
| 3   | AIAELGIYPAVDPLDSTSR     | 19     | 1987.026 | U3IP65     | 3       | 52.784 | 75,886×10 <sup>2</sup> |
| 4   | AILVDLEPGTMDSVR         | 15     | 1614.829 | U3IKI3     | 2       | 90.685 | 84,799×10 <sup>2</sup> |
| 5   | AIVAIENPADVSVISSR       | 17     | 1739.942 | U3J7Y9     | 2       | 67.385 | 0                      |
| 6   | ALTVPILTQQVFDK          | 15     | 1658.888 | U3IKI3     | 3       | 80.632 | 7.5932×10 <sup>6</sup> |
| 7   | ATENDIANFFSPLNPIR       | 17     | 1917.959 | U3I048     | 2       | 81.431 | 89,869×10 <sup>2</sup> |
| 8   | ATGEADVEFVTHEDAVAAMSK   | 21     | 2176.995 | U3I048     | 3       | 161.58 | 7053×10 <sup>4</sup>   |
| 9   | AVDWWSLG                | 8      | 932.4392 | A0A493SX27 | 2       | 75.311 | 0                      |
| 10  | AVFPSIVGRPR             | 11     | 1197.698 | A0A7K7KUC6 | 3       | 76.143 | 64,613×10 <sup>2</sup> |
| 11  | AVFVDLEPTVIDEVR         | 15     | 1700.899 | U3IJF6     | 2       | 127.87 | 92,858×10 <sup>2</sup> |
| 12  | AVLVDLEPGTMDSVR         | 15     | 1600.813 | A0A7K7KMY6 | 2       | 88.441 | 16,234×10 <sup>3</sup> |
| 13  | CVRGGDFVFFDGRDSEK       | 17     | 1960.885 | A0A7K7L5A4 | 2       | 46.706 | 0                      |
| 14  | DAGQISGLNVLR            | 12     | 1241.673 | U3IP36     | 2       | 192.91 | 94,705×10 <sup>3</sup> |
| 15  | DAGTIAGLNVLR            | 12     | 1198.667 | U3IT45     | 2       | 115.71 | 19,386×10 <sup>3</sup> |
| 16  | DLYANTVLSGGTTMYPGIADR   | 21     | 2214.063 | A0A7K7KUC6 | 2       | 47.201 | 72,135×10 <sup>2</sup> |
| 17  | DLYEDELVPLFEK           | 13     | 1608.792 | A0A7K7KZL0 | 2       | 79.82  | 35,543×10 <sup>2</sup> |
| 18  | DNYVPEVSALDQEIIIEVDPDTK | 22     | 2488.186 | A0A7K7L561 | 3       | 54.223 | 74,671×10 <sup>2</sup> |

Table S1. Cont

| No. | Sequence             | Length | Mass/Da  | Proteins   | Charges | Score  | Intensity              |
|-----|----------------------|--------|----------|------------|---------|--------|------------------------|
| 19  | DYFEEYGKIDTIEIITDR   | 18     | 2219.063 | A0A7K7L858 | 3       | 72.184 | 23,082×10 <sup>3</sup> |
| 20  | EITALAPSTMK          | 11     | 1160.611 | A0A7K7KUC6 | 2       | 112.01 | 16,503×10 <sup>3</sup> |
| 21  | ELAQVQVADDYGK        | 15     | 1690.816 | A0A7K7KS51 | 2       | 110.66 | 12,349×10 <sup>3</sup> |
| 22  | EVDEQMLNVQNK         | 12     | 1445.682 | U3IKI3     | 2       | 204.07 | 0                      |
| 23  | FEAGHDAF             | 8      | 892.3715 | U3IU92     | 2       | 104.11 | 19,767×10 <sup>3</sup> |
| 24  | FESPEVAER            | 9      | 1062.498 | A0A493T8B8 | 2       | 66.692 | 0                      |
| 25  | FLAYPQTK             | 8      | 966.5175 | P04442     | 2       | 154.35 | 122×10 <sup>6</sup>    |
| 26  | FQPGFSSS             | 8      | 855.3763 | A0A7K7L595 | 1       | 117.18 | 223×10 <sup>6</sup>    |
| 27  | FSGSKSSSTAMLT        | 13     | 1302.613 | A0A493TNK9 | 2       | 83.948 | 10,493×10 <sup>3</sup> |
| 28  | FVGDNYYRVN           | 10     | 1245.578 | A0A7K7KQP1 | 2       | 147.29 | 15,838×10 <sup>3</sup> |
| 29  | GAEAAANVTGPGGVPVQGSK | 19     | 1694.859 | A0A7K7KW68 | 2       | 78.814 | 0                      |
| 30  | GEATVSFDDPPSAK       | 14     | 1419.652 | A0A7K7LGU0 | 2       | 102.4  | 0                      |
| 31  | GFGFVTFDDHDPVDKIVLQK | 20     | 2276.148 | A0A7K7L858 | 4       | 59.512 | 51,425×10 <sup>2</sup> |
| 32  | GHQPGVTF             | 8      | 841.4083 | U3IF27     | 2       | 111.69 | 28,437×10 <sup>3</sup> |
| 33  | GKDAIAQF             | 8      | 848.4392 | A0A7K7L9Q3 | 2       | 87.754 | 196×10 <sup>6</sup>    |
| 34  | GSYGDLGGPIITTQVTIPK  | 19     | 1916.026 | U3IU09     | 2       | 61.375 | 13,648×10 <sup>3</sup> |
| 35  | GVAADYEHAL           | 10     | 1044.488 | U3IU92     | 2       | 66.682 | 0                      |
| 36  | GVEEEEDGEMRE         | 13     | 1536.589 | A0A7K7KK46 | 2       | 90.685 | 10,023×10 <sup>3</sup> |

Table S1. Cont

| No. | Sequence                | Length | Mass/Da  | Proteins    | Charges | Score  | Intensity              |
|-----|-------------------------|--------|----------|-------------|---------|--------|------------------------|
| 37  | GVPQIEVTFDIDANGIVHVS AK | 22     | 2308.206 | U3IP36      | 3       | 45.784 | 15,705×10 <sup>3</sup> |
| 38  | HISGPGSF                | 8      | 800.3817 | A0A7K7L595  | 2       | 88.201 | 0                      |
| 39  | HTGPNSPDTANDGFVR        | 16     | 1683.76  | A0A493S XK6 | 3       | 91.657 | 0                      |
| 40  | IAPPEAPVTGYMFGK         | 15     | 1576.796 | U3J3C9      | 2       | 77.64  | 48,638×10 <sup>2</sup> |
| 41  | IDTIEIITDR              | 10     | 1187.64  | A0A7K7L858  | 2       | 138.4  | 18,724×10 <sup>3</sup> |
| 42  | IFEAGR DV               | 8      | 905.4607 | A0A7K7LC88  | 2       | 62.714 | 0                      |
| 43  | IFVGGLNPEATEEK          | 14     | 1502.762 | R0JDB7      | 2       | 168.3  | 69,815×10 <sup>3</sup> |
| 44  | IFVGGLSPDTPEEK          | 14     | 1487.751 | A0A7K7LE07  | 2       | 179.57 | 92,035×10 <sup>3</sup> |
| 45  | IIDVVYNASNELVR          | 15     | 1717.9   | R0L3S3      | 2;3     | 99.215 | 60,292×10 <sup>2</sup> |
| 46  | IINEPTAAAIAYGLDK        | 16     | 1658.888 | U3I640      | 2;3     | 100.55 | 1716×10 <sup>4</sup>   |
| 47  | IITITGTQDQIQNAQYLLQNSVK | 23     | 2588.381 | U3IU09      | 3       | 87.156 | 45,867×10 <sup>2</sup> |
| 48  | INATNIDSFKNCTK          | 14     | 1567.766 | A0A493TAW2  | 2       | 99.568 | 54,516×10 <sup>3</sup> |
| 49  | IPPSFSPLVL              | 10     | 1068.622 | U3IYP8      | 2       | 70.268 | 0                      |
| 50  | IREYFGEFGEIEAIELPMDPK   | 21     | 2482.209 | R0JDB7      | 3       | 55.588 | 50,171×10 <sup>2</sup> |
| 51  | ISVYYNEATGGK            | 12     | 1300.63  | U3IKI3      | 2       | 93.096 | 95,377×10 <sup>2</sup> |
| 52  | ITITNDQNR               | 9      | 1073.547 | U3I640      | 2       | 116.73 | 46,523×10 <sup>3</sup> |
| 53  | ITPSYVAFTPEGER          | 14     | 1565.773 | U3I640      | 2       | 97.734 | 14,686×10 <sup>3</sup> |
| 54  | KSQVFSTAADGQTQVEIK      | 18     | 1935.99  | U3IP36      | 3       | 85.808 | 88,807×10 <sup>2</sup> |

Table S1. Cont

| No. | Sequence                  | Length | Mass/Da  | Proteins   | Charges | Score  | Intensity              |
|-----|---------------------------|--------|----------|------------|---------|--------|------------------------|
| 55  | LAPDYDALDVANK             | 13     | 1403.693 | U3HYT9     | 2       | 104.52 | 1439×10 <sup>4</sup>   |
| 56  | LIEVDDER                  | 8      | 987.4873 | R0K7Y6     | 2       | 70.919 | 1733×10 <sup>4</sup>   |
| 57  | LKGEATVSFDDPPSAK          | 16     | 1660.831 | A0A7K7LGU0 | 2       | 68.277 | 14,789×10 <sup>3</sup> |
| 58  | LNSSTFLN                  | 8      | 894.4447 | A0A7K7KT01 | 2       | 71.342 | 14,116×10 <sup>3</sup> |
| 59  | LPESYAQSIYMQRRN           | 15     | 1854.905 | A0A7K7LKZ6 | 2       | 56.563 | 0                      |
| 60  | LPSTSPVTGY                | 10     | 1020.513 | U3IZ83     | 2       | 65.038 | 0                      |
| 61  | LSSPPSVNFV                | 10     | 1045.544 | A0A493TVU4 | 2       | 67.169 | 0                      |
| 62  | LTPEEIER                  | 8      | 985.508  | U3I640     | 2       | 62.546 | 0                      |
| 63  | LVAIVDVIDQNR              | 12     | 1353.762 | U3I808     | 2       | 85.377 | 13,884×10 <sup>2</sup> |
| 64  | LVEAAAKN                  | 8      | 814.4549 | R0KCT6     | 2       | 60.788 | 0                      |
| 65  | LVQDVANNTNEEAGDGTSTATVLAR | 25     | 2559.241 | A0A7K7LE25 | 3       | 66.3   | 0                      |
| 66  | MIETAQVDER                | 10     | 1190.56  | R0JL85     | 2       | 76.827 | 0                      |
| 67  | NAVITVPAYFNDSQR           | 15     | 1693.842 | U3IP36     | 2       | 148.18 | 63,563×10 <sup>3</sup> |
| 68  | NFILDQTNVSAAAQR           | 15     | 1646.838 | R0L9Z5     | 2;3     | 213.16 | 24,578×10 <sup>3</sup> |
| 69  | NIQGAQDMGVPSAWV           | 15     | 1571.74  | R0JVJ2     | 2       | 58.699 | 0                      |
| 70  | NMLDRLS                   | 8      | 960.5063 | R0LI37     | 2       | 71.296 | 0                      |
| 71  | NMGGPYGGGNYGPGSGSGGYGGR   | 25     | 2188.898 | A0A7K7L858 | 2       | 149.09 | 1322×10 <sup>4</sup>   |
| 72  | NPDDITNEEYGEFYK           | 15     | 1832.774 | A0A7K7LEE6 | 2       | 114.72 | 10,459×10 <sup>3</sup> |

Table S1. Cont

| No. | Sequence             | Length | Mass/Da  | Proteins   | Charges | Score  | Intensity              |
|-----|----------------------|--------|----------|------------|---------|--------|------------------------|
| 73  | NQLTSNPENTVFDK       | 15     | 1676.801 | U3I640     | 2       | 147.71 | 24,117×10 <sup>3</sup> |
| 74  | NQVAMNPTNTVFDK       | 15     | 1648.788 | U3IT45     | 2       | 83.617 | 0                      |
| 75  | NVQAEEMVEFSSGLK      | 15     | 1666.787 | A0A7K7LHY3 | 2       | 117.23 | 0                      |
| 76  | PISETEPQEDKGSQINV    | 17     | 1869.896 | R0JIU5     | 2       | 61.353 | 92,384×10 <sup>2</sup> |
| 77  | QFQPGFSSS            | 9      | 983.4349 | A0A7K7L595 | 2       | 113.7  | 137×10 <sup>6</sup>    |
| 78  | QFQPGFSSSG           | 10     | 1040.456 | A0A7K7L595 | 2       | 102    | 0                      |
| 79  | QQLSAEELDAQLDAYNAR   | 18     | 2033.965 | R0KBD0     | 3       | 67.449 | 42,623×10 <sup>3</sup> |
| 80  | RVPELMDSQ            | 9      | 1073.518 | A0A7K7LNG1 | 2       | 113.71 | 18,454×10 <sup>3</sup> |
| 81  | SDGAITWNN            | 9      | 976.425  | A0A7K7LNG1 | 1       | 103.56 | 25,521×10 <sup>3</sup> |
| 82  | SDIGEVLVGGMTR        | 14     | 1445.755 | U3IP36     | 2       | 108.35 | 16,139×10 <sup>3</sup> |
| 83  | SEAEELPGMELRGLQLGYPQ | 20     | 2216.078 | A0A7K7KQ17 | 2       | 41.54  | 0                      |
| 84  | SELSNLHAY            | 9      | 1032.488 | P04442     | 2       | 81.297 | 0                      |
| 85  | SGNFGGSR             | 8      | 780.3515 | A0A7K7L858 | 2       | 91.853 | 0                      |
| 86  | SLAGDLEK             | 8      | 831.4338 | A0A493T6Z7 | 2       | 62.717 | 0                      |
| 87  | SLLDSRLRAANE         | 12     | 1343.716 | R0K202     | 2       | 88.948 | 20,263×10 <sup>3</sup> |
| 88  | SLPSNVVQDSGRAY       | 14     | 1491.732 | U3I742     | 2       | 79.741 | 43,697×10 <sup>2</sup> |
| 89  | SPQLRDQI             | 8      | 955.5087 | A0A493TKR2 | 2       | 68.915 | 0                      |
| 90  | SPSTVFENHY           | 9      | 1050.477 | A0A7K7KQP1 | 2       | 176.41 | 22,777×10 <sup>3</sup> |

Table S1. Cont

| No. | Sequence                | Length | Mass/Da  | Proteins   | Charges | Score  | Intensity              |
|-----|-------------------------|--------|----------|------------|---------|--------|------------------------|
| 91  | SQIFSTASDNQPTVTIK       | 17     | 1835.927 | U3I640     | 2;3     | 139.3  | 48,176×10 <sup>3</sup> |
| 92  | SQVFSTAADGQTQVEIK       | 17     | 1807.895 | U3IP36     | 2;3     | 226.23 | 85,655×10 <sup>3</sup> |
| 93  | SRGFGFVTFSSMAEVDAAAMAAR | 22     | 2307.078 | A0A7K7L858 | 3       | 45.363 | 0                      |
| 94  | SSGSPYGGGYGSGSGSGGYGGR  | 22     | 1909.783 | R0LJ35     | 2       | 65.472 | 32,667×10 <sup>3</sup> |
| 95  | STESLQANVQR             | 11     | 1231.616 | R0LLL2     | 2       | 163.72 | 13,027×10 <sup>3</sup> |
| 96  | STGEAFVQFASQEIAEK       | 17     | 1840.884 | A0A493SXX6 | 2       | 136.99 | 40,989×10 <sup>3</sup> |
| 97  | SVGDGETVEFDVVEGEK       | 17     | 1794.816 | A0A7K7KW68 | 2       | 79.633 | 36,812×10 <sup>2</sup> |
| 98  | SVTEQGAELSNEER          | 14     | 1547.706 | R0L3T4     | 2       | 79.693 | 52,439×10 <sup>2</sup> |
| 99  | SYELPDGQVITIGNER        | 16     | 1789.885 | A0A7K7KUC6 | 2       | 72.089 | 24,625×10 <sup>3</sup> |
| 100 | TDASSASSFLDSDELER       | 17     | 1828.796 | R0LPV2     | 2       | 48.659 | 0                      |
| 101 | TDYNASVSVPDSSGPER       | 17     | 1779.791 | U3IU09     | 2       | 130.15 | 35,011×10 <sup>3</sup> |
| 102 | TGYTLDVTTGQR            | 12     | 1310.647 | A0A7K7KZL0 | 2       | 146.11 | 1403×10 <sup>4</sup>   |
| 103 | TIGGGDDSFNTFFSETGAGK    | 20     | 2006.886 | U3IJF6     | 2;3     | 65.805 | 2923×10 <sup>4</sup>   |
| 104 | TITLEVEPSDTIENVK        | 16     | 1786.92  | Q7ZSY5     | 2;3     | 160.15 | 39,164×10 <sup>3</sup> |
| 105 | TSIAIDTIINQK            | 12     | 1315.735 | A0A7K7LHY3 | 2       | 85.29  | 47,152×10 <sup>2</sup> |
| 106 | TTPSVVAFTADGER          | 14     | 1449.71  | U3IP36     | 2;3     | 130.01 | 135×10 <sup>6</sup>    |
| 107 | TTPSYVAFTDTER           | 13     | 1486.694 | U3IT45     | 2       | 169.58 | 98,999×10 <sup>3</sup> |
| 108 | TVIDTSGG                | 8      | 748.3603 | R0LWA9     | 1       | 118.69 | 60,957×10 <sup>2</sup> |

**Table S1.** *Cont*

| No. | Sequence              | Length | Mass/Da  | Proteins   | Charges | Score  | Intensity              |
|-----|-----------------------|--------|----------|------------|---------|--------|------------------------|
| 109 | TVNELQNLTAAEVVVPR     | 17     | 1852.005 | R0L8J7     | 2;3     | 113.76 | 22,749×10 <sup>3</sup> |
| 110 | VALSSLRP              | 8      | 841.5022 | U3I3Y9     | 2       | 111.28 | 329×10 <sup>6</sup>    |
| 111 | VAPEEHPVLLTEAPLNPK    | 18     | 1953.057 | A0A7K7KUC6 | 3       | 63.145 | 85,334×10 <sup>3</sup> |
| 112 | VEIANDQGNR            | 11     | 1227.621 | U3I640     | 2       | 153.05 | 26,998×10 <sup>3</sup> |
| 113 | VINEPTAAALAYGLDK      | 16     | 1644.872 | U3IP36     | 2       | 100.55 | 48,684×10 <sup>3</sup> |
| 114 | VINEPTAAALAYGLDKSEDK  | 20     | 2104.069 | U3IP36     | 3       | 85.231 | 7392×10 <sup>3</sup>   |
| 115 | VISSIEQK              | 8      | 902.5073 | R0JH47     | 2       | 117.16 | 73,211×10 <sup>2</sup> |
| 116 | VTDALNATR             | 9      | 959.5036 | A0A7K7LE25 | 2       | 156.51 | 76,062×10 <sup>2</sup> |
| 117 | VTGEADVEFATHEDAVAAMSK | 21     | 2176.995 | A0A493SXX6 | 3       | 63.184 | 10,188×10 <sup>3</sup> |
| 118 | VVDLLAPYAK            | 10     | 1087.628 | U3IP65     | 2       | 68.224 | 0                      |
| 119 | WDAPAVTVR             | 9      | 1013.529 | U3IZ83     | 2       | 113.26 | 26,526×10 <sup>3</sup> |
| 120 | WITSIGLQ              | 8      | 916.5018 | U3I182     | 2       | 62.715 | 0                      |
| 121 | WKEELQDL              | 8      | 1059.524 | A0A493TLU3 | 2       | 86.086 | 0                      |
